# Supplementary material
Source: ML conference proceedings conference paper supplement (https://openreview.net/forum?id=bTRH1O5Bp2)
Supplement: supplementary_material [file gmacs_vs_perf_retrieval.pdf › Supplementary_materials/InternVL2.5-2B/clip_benchmark/probe_benchmark/gmacs_vs_perf_retrieval.pdf]

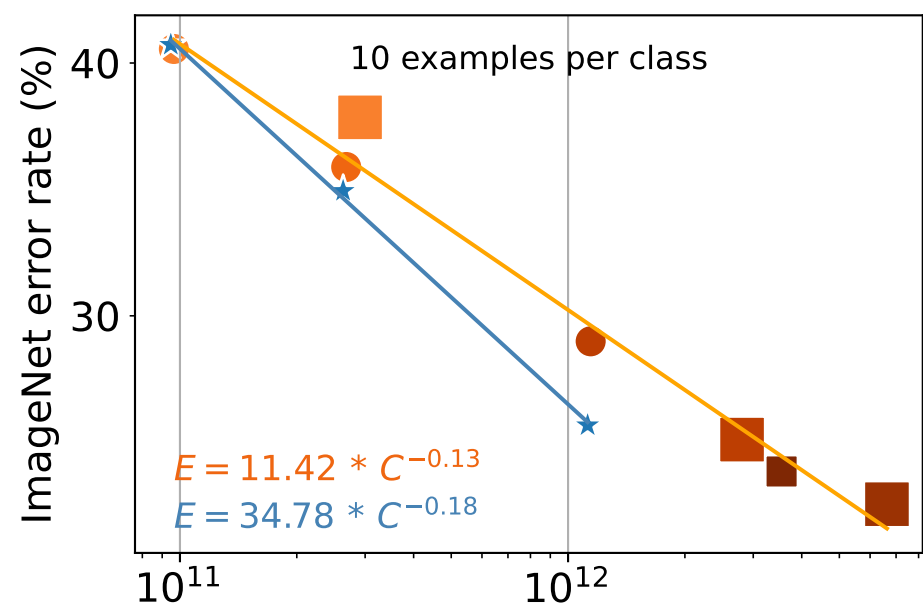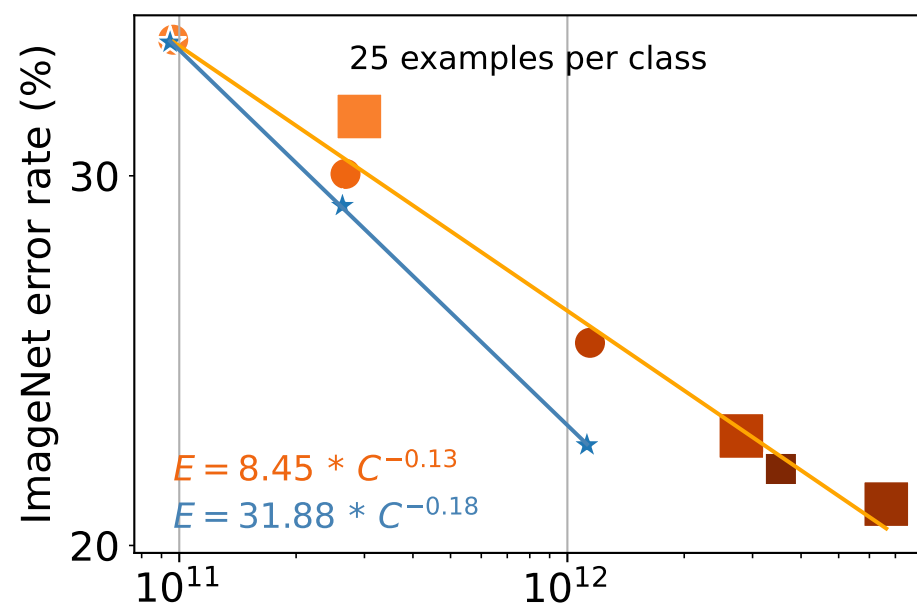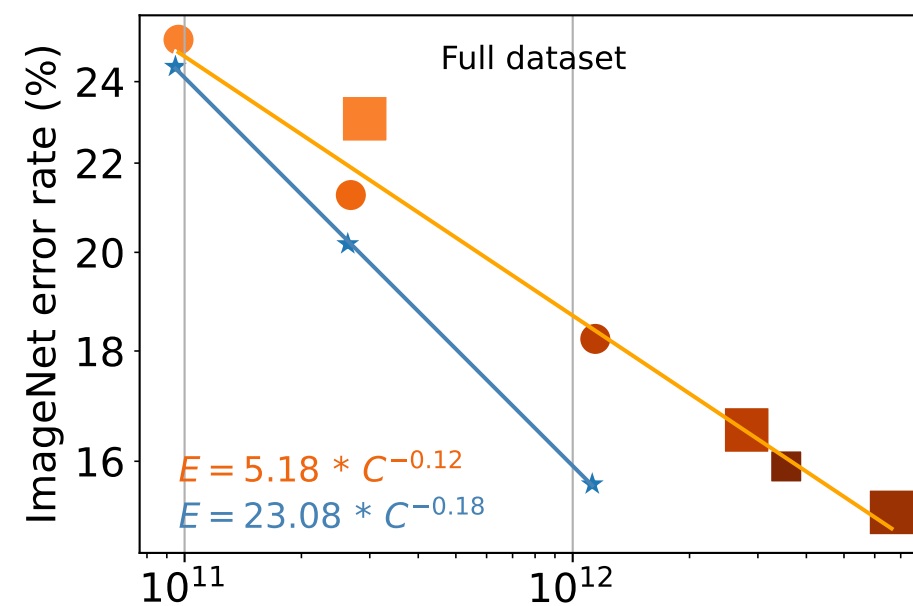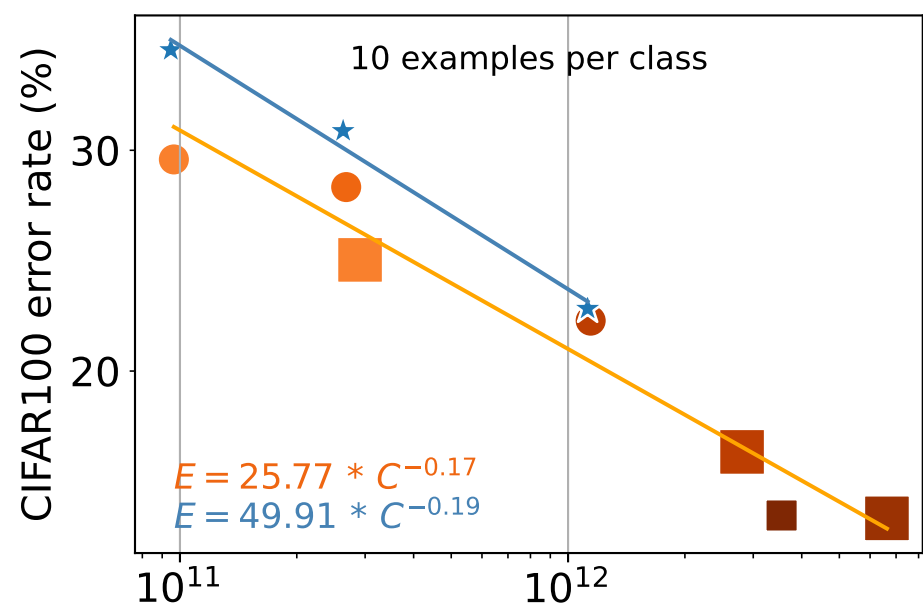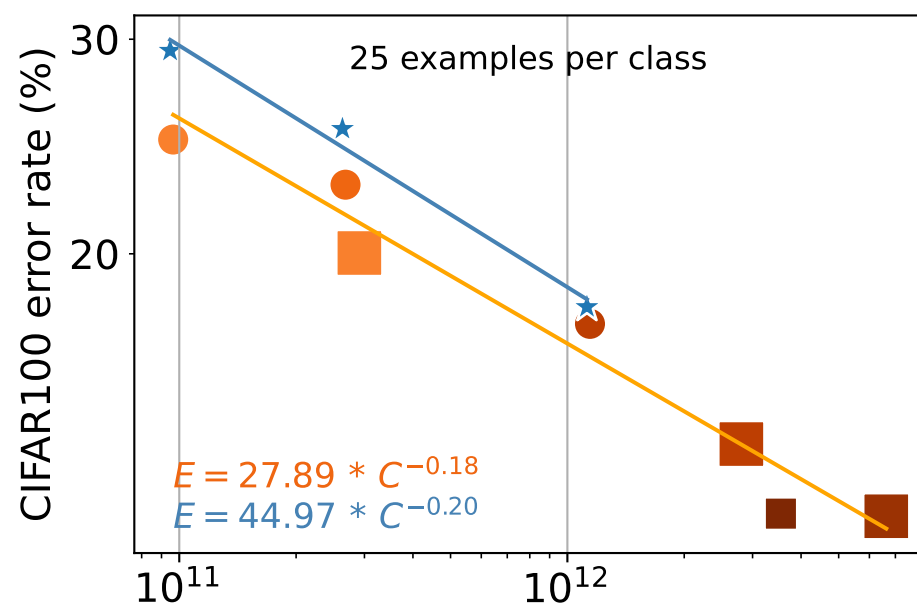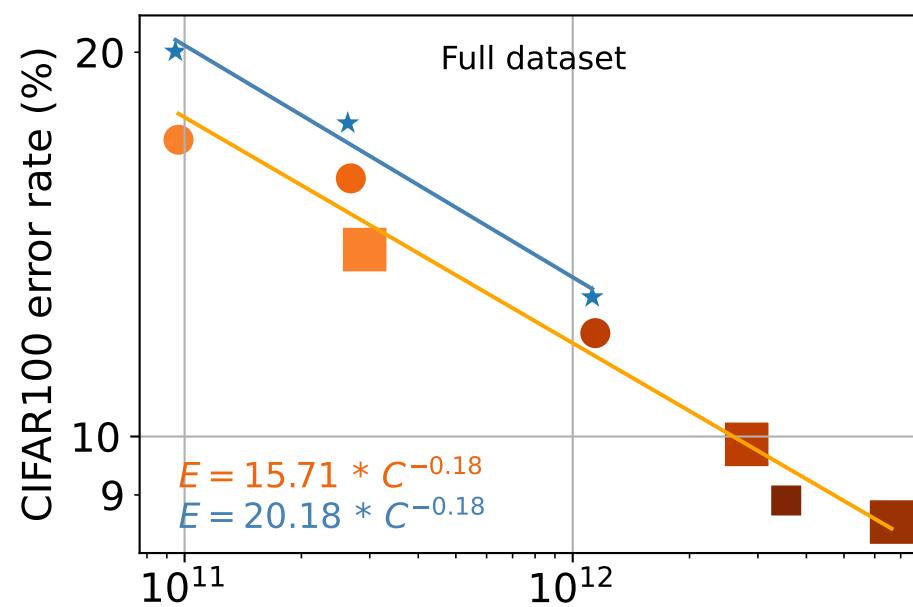

Total compute  
(GMACS per sample x samples seen)

Total compute  
(GMACS per sample x samples seen)

Total compute  
(GMACS per sample x samples seen)
