# Supplementary material
Source: ML conference proceedings conference paper supplement (https://openreview.net/forum?id=bTRH1O5Bp2)

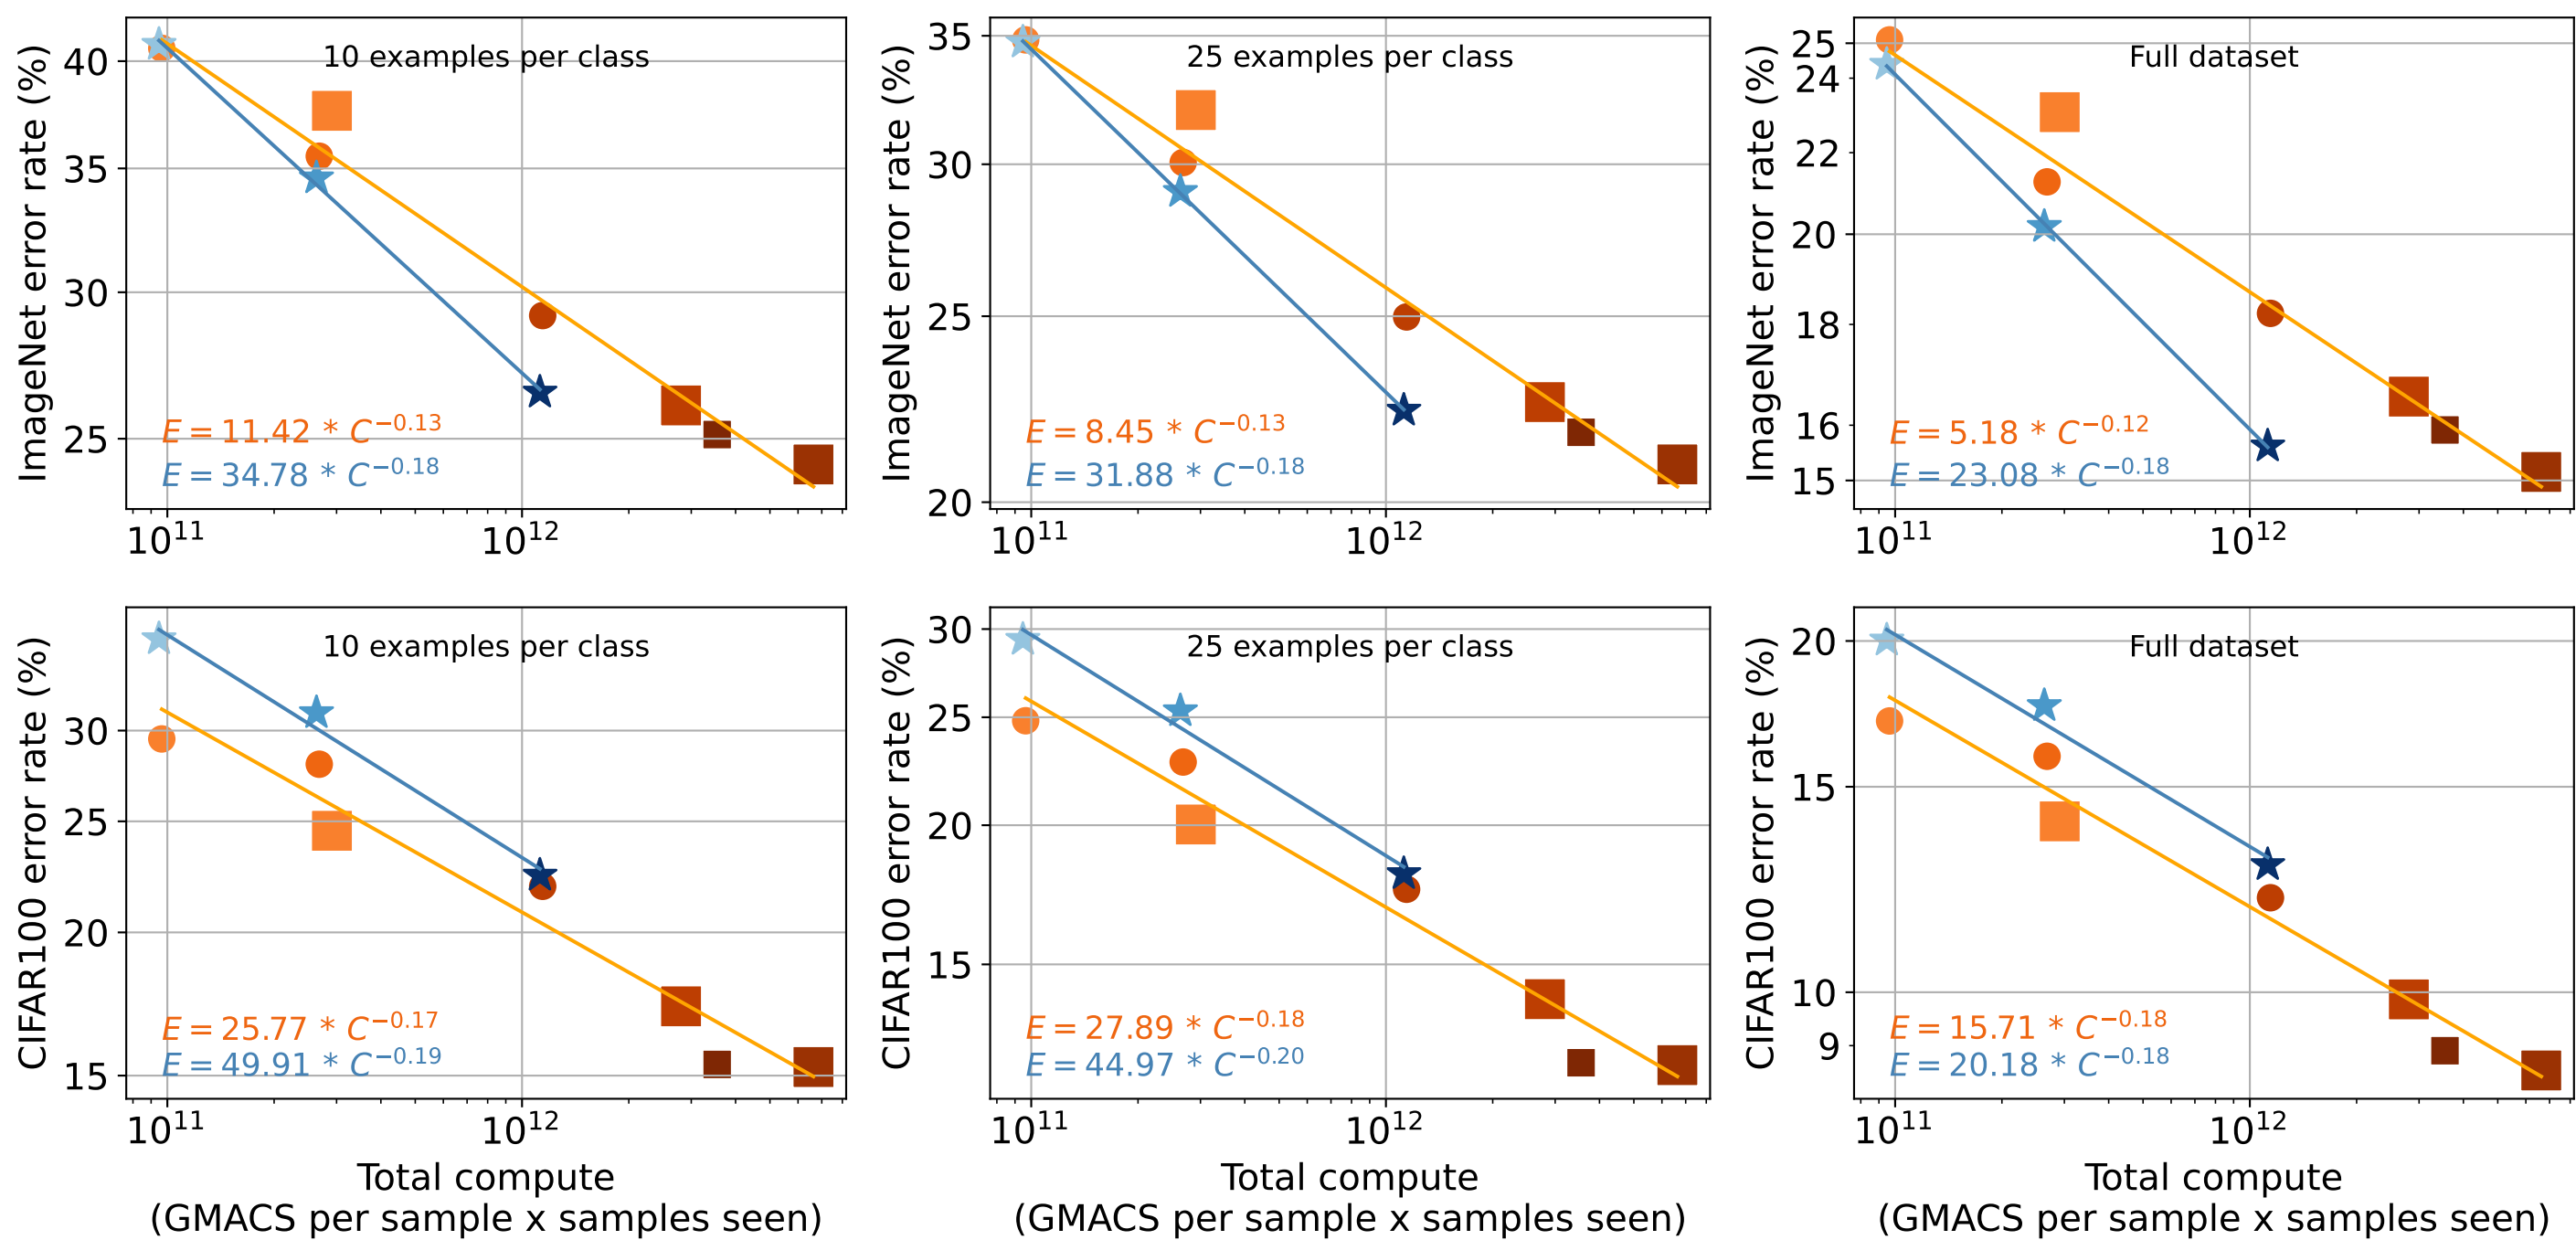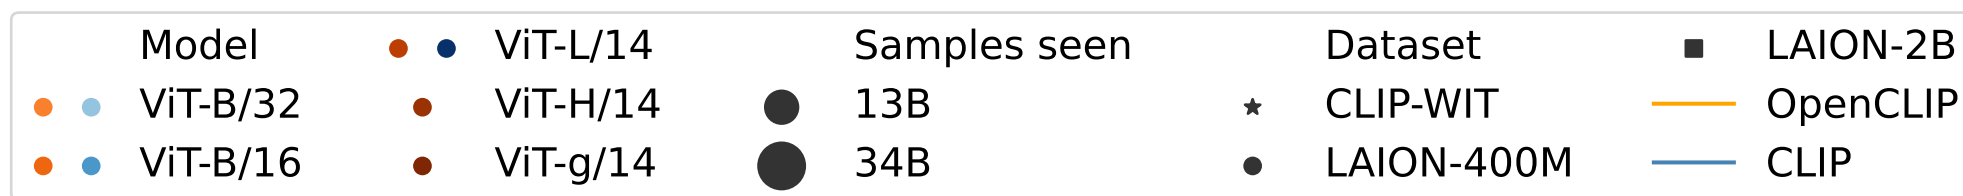

Supplement: supplementary_material [file imagenet_cifar_lp.pdf › Supplementary_materials/InternVL2.5-2B/clip_benchmark/probe_benchmark/imagenet_cifar_lp.pdf]

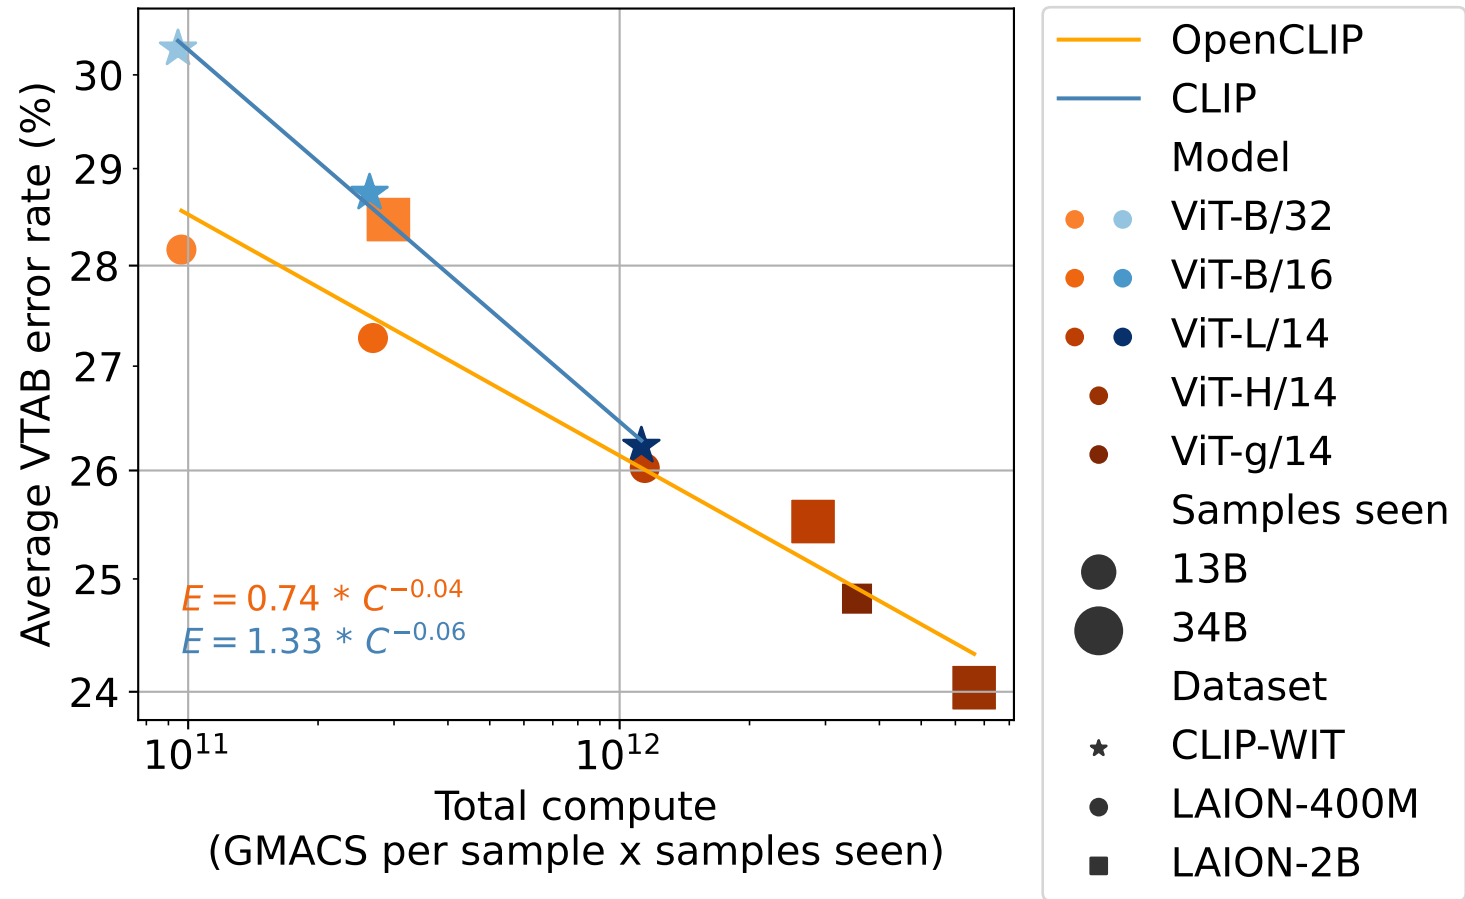

Supplement: supplementary_material [file imagenet_cifar_lp_vtab.pdf › Supplementary_materials/InternVL2.5-2B/clip_benchmark/probe_benchmark/imagenet_cifar_lp_vtab.pdf]
